# Supplementary material for: Glutamine, but not Branched-Chain Amino Acids, Restores Intestinal Barrier Function during Activity-Based Anorexia
Source: PubMed Central journal article supplement (PMC6628073; doi:10.3390/nu11061348), 2019-06-15
Supplement: nutrients-11-01348-s001.pdf [file nutrients-11-01348-s001.pdf]

**Table S1.** Primers sequences used for qPCR.

| <b>Genes</b>  | <b>Sens</b> | <b>Sequences</b>                   |
|---------------|-------------|------------------------------------|
| 18S           | F           | 5'-TGCGAGTACTCAACACCAACA-3'        |
|               | R           | 5'-TTCCTCAACACCACATGAGC-3'         |
| $\beta$ 2M    | F           | 5'-GCCGAACATACTGAACTGCTAC-3'       |
|               | R           | 5'-GCTGAAGAACATATCTGACATCTC-3'     |
| CLDN-1        | F           | 5'-CTGGGTTTCATCCTGGCTTC-3'         |
|               | R           | 5'-TTGATGGGGGTCAAGGGGTC-3'         |
| CLDN-2        | F           | 5'-ATACTACCCTTTAGCCCTGACCGAGA-3'   |
|               | R           | 5'-CAGTAGGAGCACACATAACAGCTACCAC-3' |
| GAPDH         | F           | 5'-CATCACTGCCACTCAGAAGA-3'         |
|               | R           | 5'-AAGTCACAGGAGACAACCT-3'          |
| IL-1 $\beta$  | F           | 5'-CCCAAAAGATGAAGGGCTGC-3'         |
|               | R           | 5'-AAGGTCCACGGGAAAGACAC-3'         |
| IL-6          | F           | 5'-CACTTCACAAGTCGGAGGCT-3'         |
|               | R           | 5'-CTGCAAGTGCATCATCGTTGT-3'        |
| IL-10         | F           | 5'-ACCTGGTAGAAGTGATGCCC-3'         |
|               | R           | 5'-GCTCCACTGCCTTGCTTTAT-3'         |
| MCP-1         | F           | 5'-TTAAAAACCTGGATCGGAACCAA-3'      |
|               | R           | 5'-GCATTAGCTTCAGATTTACGGGT-3'      |
| MUC-2         | F           | 5'-CGACACCAGGGATTCGCTTAAT-3'       |
|               | R           | 5'-CACTTCCACCCTCCCGCAAAC-3'        |
| NPY           | F           | 5'-CTGCGACACTACATCAATCT-3'         |
|               | R           | 5'-CTTCAAGCCTTGTTCTGG-3'           |
| OCLN          | F           | 5'-AGACTACACGACAGGTGGGG-3'         |
|               | R           | 5'-CTGCAGACCTGCATCAAAT-3'          |
| POMC          | F           | 5'-CCTCCTGCTTCAGACCTCCA-3'         |
|               | R           | 5'-GGCTGTTTCATCTCCGTTGC-3'         |
| TNF- $\alpha$ | F           | 5'-TGTCTACTCCTCAGAGCCCC-3'         |
|               | R           | 5'-TGAGTCCTTGATGGTGGTGC-3'         |
| ZO-1          | F           | 5'-GCAGACTTCTGGAGGTTTCG-3'         |
|               | R           | 5'-CTTGCCAACTTTTCTCTGGC-3'         |
